# Transmural and rate-dependent profiling of drug-induced arrhythmogenic risks through in silico simulations of multichannel pharmacology

1 **Ping'an Zhao<sup>1,#a</sup>, and Pan Li<sup>1\*</sup>**

2 <sup>1</sup>Center for Public Health Informatics, School of Public Health, Xinxiang Medical University, Henan, P.R.  
3 China

4 **\*Corresponding author**

5 Email: [panli@xxmu.edu.cn](mailto:panli@xxmu.edu.cn) (PL)

6 <sup>#a</sup> Current Address: Center for Public Health Informatics, School of Public Health, Xinxiang Medical  
7 University, Xinxiang, Henan, P.R. China, 453003

8 Tel.: (86) 13303806950

## 9 Abstract

10 **Background:** In vitro hERG blockade assays alone provide insufficient information to accurately discriminate  
11 “safe” from “dangerous” drugs. Recent studies have suggested that the integration of multiple ion channel  
12 inhibition data can improve the prediction of drug-induced arrhythmogenic risks. In this study, using a family  
13 of cardiac cell models representing electrophysiological heterogeneities across the ventricular wall, we  
14 quantitatively evaluated transmural and rate-dependent properties of drug-induced arrhythmogenicity through  
15 computer simulations of multichannel pharmacology.

16 **Methods and Results:** Rate-dependent drug effects of multiple ion channel inhibition on cardiac  
17 electrophysiology at their effective free therapeutic plasma concentrations (EFTPCs) were investigated using  
18 a group of in silico cell models (Purkinje (P) cells, endocardial (Endo) cells, mid-myocardial (M) cells and  
19 epicardial (Epi) cells). We found that (1) M cells are much more sensitive than the other cell types to drug-  
20 induced arrhythmias and can develop early afterdepolarization (EAD) in response to bepridil, dofetilide,  
21 sotalol, terfenadine, cisapride or ranolazine. (2) Most drug-induced adverse effects, such as pronounced action  
22 potential prolongations or EADs, occur at slower pacing rates. (3) Although most drug-induced EADs occur  
23 in M cells, the application of quinidine at its EFTPC can cause EADs in all four cell types. (4) The underlying  
24 ionic mechanism of drug-induced EADs differs across different cell types; while  $I_{NaL}$  is the major depolarizing  
25 current during the generation of EAD in P cells,  $I_{CaL}$  is mostly predominant in other cell types. (5) Drug-  
26 induced AP alternans with larger beat-to-beat variations occur at high pacing rates in mostly P cells, while the  
27 application of bepridil can cause alternating EAD patterns at slower pacing rates in M cells.

28 **Conclusions:** In silico analysis of transmural and rate-dependent properties using multichannel inhibition data  
29 can be useful to accurately predict drug-induced arrhythmogenic risks and can also provide mechanistic  
30 insights into drug-induced adverse events related to cardiac arrhythmias.

31 Key words: cardiotoxicity; CiPA; multichannel pharmacology; computer modelling; arrhythmia; drug safety\

## 33 Author summary

34 In vitro hERG blockade assays alone provide insufficient information to accurately discriminate “safe”  
35 from “dangerous” drugs, and computer simulation of ventricular action potential using multichannel inhibition

36 data could be a useful tool to evaluate drug-induced arrhythmogenic risks. Our study suggested that the  
37 profiling of drug-induced transmural heterogeneities in cellular electrophysiology at all  
38 physiological pacing frequencies can be essential for the comprehensive evaluation of drug safety, and for the  
39 quantitative investigation into ionic mechanisms underlying drug-specific arrhythmogenic events. These in  
40 silico models and approaches may contribute to the ongoing construction of a comprehensive paradigm for  
41 the evaluation of drug-induced arrhythmogenic risks, potentially increase the success rate and accelerate the  
42 process of novel drug development.

## 44 **Introduction**

45 Drug-induced cardiotoxicity has been a major concern since the early stage of novel drug development.  
46 Unexpected post-marketing occurrence of cardiotoxic effects remains a leading cause of drug withdrawal and  
47 relabelling<sup>[1-3]</sup>. As defined by the International Conference of Harmonization Expert Working Group for all  
48 drugs in development, QT interval prolongation has been used as a biomarker to predict the potential risk of  
49 Torsade de Pointes (TdP)<sup>[4, 5]</sup>. Most drugs that prolong the QT interval inhibit cardiac potassium channels  
50 encoded by human ether-à-go-go related gene (hERG); therefore, the level of hERG channel inhibition has  
51 been the "gold standard" to predict the TdP risk. However, recent studies suggested that the in vitro hERG  
52 blockade assay alone provides insufficient information to accurately discriminate "safe" from "dangerous"  
53 drugs. For instance, QT prolongation can be induced by drugs that inhibit other ionic channels such as  $I_{Ks}$ , and  
54 it has been known for years that the arrhythmia associated with hERG blockade is mitigated by concurrent  
55 blockade of  $Na^+$  or  $Ca^{2+}$  channels<sup>[6, 7]</sup>. Other electrocardiogram (ECG) abnormalities, such as QT shortening  
56 or T wave alternation, are also frequently associated with TdP. Recently, the Comprehensive in vitro  
57 Proarrhythmia Assay (CiPA) has been proposed to address the misidentification issue of drug-associated TdP  
58 risk based on hERG inhibition and QT prolongation data. This new paradigm is based on integrated assessment  
59 of multiple ion channel dynamics in delayed ventricular repolarization; alterations to this process lead to  
60 repolarization in stability and arrhythmias<sup>[8]</sup>.

61 Computational modelling of the heart has been an important tool in advancing our understanding of  
62 cardiac excitation-contraction coupling. Recent studies have utilized mathematical modelling to evaluate the

63 drug-induced proarrhythmic risk<sup>[9-12]</sup>. For example, multiple cardiac ion channels were integrated into the  
64 human myocyte model to improve the assessment of proarrhythmic risk<sup>[13]</sup>. Additionally, research institutions  
65 classify the cardiac toxicity of drugs through a computational approach that combines a human ventricular  
66 myocyte model of drug effects and machine learning<sup>[14]</sup>. However, researchers have performed experiments  
67 on only one cell type. Here, we employed a series of mathematical models and performed quantitative analyses  
68 of drug-induced arrhythmogenic risk in four cell types and physiological frequencies through multichannel  
69 pharmacology.

## 71 **Results**

### 72 **Transmural heterogeneity of cardiac AP morphologies and adaptations**

73 Transmural action potential (AP) morphologies are shown during steady-state pacing (cycle length  
74 (CL)=1000 ms) and action potential duration (APD) rate adaptations (Figure 1). The APD in mid-myocardial  
75 (M) cells was longer than that in epicardial (Epi) cells or endocardial (Endo) cells and was considerably shorter  
76 than the APD in Purkinje (P) cells. The AP amplitude in P cells was considerably higher than that in different  
77 types of ventricular cells. In Epi and M cells, AP reproduced a characteristic phase 1 notch and dome  
78 morphology, which was not apparent in Endo cells. In addition, the notch and dome morphology was absent  
79 in simulated P cells. The APD was prolonged as the heart rate slowed down. The simulated cell AP  
80 morphology and APD adaptation curve were consistent with previous experiments<sup>[18, 19]</sup>.

### 81 **Drug-induced changes in AP adaptations**

82 Drug-induced changes in AP adaptations were shown in Figure 2. For bepridil, cisapride, terfenadine and  
83 dofetilide, simulated APD was significantly prolonged (the percentage of prolongation>10%) in all cell types  
84 and moderately prolonged for sotalol and ranolazine, and EAD was triggered exclusively in M cells. In  
85 contrast, chlorpromazine, verapamil and ondansetron caused moderate prolongation, and diltiazem and  
86 mexiletine led to minor APD shortening by 0.9% and 2.6% at CL=2000 ms in P cells, respectively, while  
87 causing a positive shift of APD adaptation curves in other cells. Furthermore, at CL=1000 ms, cisapride caused

88 APD prolongation of 12.6%, 14.3% and 15.7% in P, Epi and Endo cells, respectively, while it caused APD  
89 prolongation of 129.3% in M cells. In general, the percentages of drug-induced APD prolongations were much  
90 higher in M cells. For example, at CL=1000 ms, bepridil caused APD prolongation of 15% (P cells), 27% (Epi  
91 cells) and 25.6% (Endo cells) respectively, and caused APD prolongation of 158% in M cells. Drug-induced  
92 changes in APD is highly dependent on pacing CLs or rates, with drug-induced EAD events mostly associated  
93 with slower pacing rates. For example, in M cells, the percentage of APD prolongation of ranolazine was 7.5%  
94 (CL=500 ms) and 9.4% (CL=1000 ms), while ranolazine induced EAD (102.9%) at CL=2000 ms. These  
95 results suggested that M cells could be more sensitive in general to drug-induced APD prolongation and EAD  
96 events, and interestingly P cells are more sensitive to AP alternans.

### 97 **Transmural characteristics of drug-induced arrhythmogenicity**

98 The AP and ionic channel dynamics of cisapride and dofetilide were examined at fixed BCL =1000 ms  
99 (Figure 3). In Endo cells, cisapride caused APD prolongation of 15.7%, and the inward current of  $I_{NaL}$   
100 displayed a slight increase compared to that of the control. The inward current of  $I_{CaL}$  and the outward current  
101 of  $I_{to}$  were almost the same as those of the control. The outward current of  $I_{Kr}$  displayed a 29.3% reduction in  
102 the peak. In M cells, drug-induced changes in  $I_{NaL}$  and  $I_{Kr}$  were mostly responsible for APD prolongation of  
103 129.3%.  $I_{to}$  was larger in M cells than in Endo cells, resulting in a significantly greater notch  $V_{max}$  in M cells.  
104  $I_{CaL}$  plays a major role in the genesis of EADs, and the reactivation of  $I_{CaL}$  coincided with EADs (Figure 3A).  
105 In P cells, dofetilide caused APD prolongation of 15.1%, while it was 132.6% with EAD generation in M cells.  
106 In M cells, EAD occurs because  $I_{CaL}$ ,  $I_{NaL}$  and  $I_{Kr}$  play significant roles in the prolongation of APD (Figure  
107 3B).

### 108 **Rate-dependent properties of drug-induced arrhythmogenicity**

109 To assess the rate dependence, we evaluated ionic channel dynamics at different frequencies (0.5Hz, 1Hz,  
110 and 2Hz) with the application of ranolazine and bepridil in M cells. Ranolazine caused an APD prolongation  
111 of 7.5% (CL=500 ms), 9.4% (CL=1000 ms) and 102.9% (CL=2000 ms), respectively. At CL=500 ms, hERG  
112 blockade was mitigated by the concurrent inhibition of  $Na^+$  channels ( $I_{NaL}$ ), resulting in slight prolongation of  
113 APD. At CL=2000 ms, in addition to the interplay between  $I_{Kr}$  and  $I_{NaL}$ , the inward current  $I_{CaL}$  increased,

114 giving rise to the pronounced prolongation of APD and occurrence of EAD (Figure 4A). Bepridil caused APD  
115 prolongation of 31%, 158.1% and 255.2%, at CL=500 ms, 1000 ms, and 2000 ms, respectively. At CL=500  
116 ms,  $I_{Kr}$  was a major current responsible for APD prolongation; inhibition of  $I_{NaL}$  could shorten APD, attenuate  
117 the prolongation resulting from hERG ( $I_{Kr}$ ) inhibition and prevent EAD (Figure 4B).

## 118 **Drug-induced early afterdepolarization (EAD) and AP alternans**

119 With the application of quinidine in all four types of cells at CL=2000 ms, large amplitude EADs  
120 developed starting from the 133<sup>rd</sup> beat in Endo cells (Figure 5A). Persistent EAD events occurred starting at  
121 the 4<sup>th</sup> beat in M cells, and these cells died at the 6<sup>th</sup> beat (Figure 5B). EADs developed starting from the 3<sup>rd</sup>  
122 beat in Epi cells (Figure 5C). Consecutive EADs were generated from the 1503<sup>rd</sup> beat (Figure 5D).  
123 Additionally, during the generation of EAD,  $I_{CaL}$  produced a current of much larger amplitude than did  $I_{NaL}$ ,  
124 and  $I_{CaL}$  preceded the reactivation of  $I_{NaL}$  in ventricular cells (Endo, M, and Epi). However, in P cells, the  
125 reactivation of  $I_{NaL}$  was larger in amplitude and preceded that of  $I_{CaL}$ .  $I_{CaL}$  also reactivated during the EAD  
126 upstroke, but its contribution was secondary to that of  $I_{NaL}$ . Thus, the ionic mechanisms of EAD in P cells or  
127 V cells rely on different ion channels during a prolonged plateau;  $I_{NaL}$  is the major depolarizing current for  
128 EAD in P cells, while in V cells, it is  $I_{CaL}$ .

129 Drug-induced AP alternans and underlying ionic currents were shown in Figure 6. With the application  
130 of dofetilide or bepridil, AP prolongation with enhanced beat-to-beat variations (alternans) was observed at  
131 CL=300 ms in P cells; with the application of verapamil, AP prolongation with no beat-to-beat variations was  
132 shown. In addition, the application of bepridil can also cause alternating EAD patterns at slower pacing rates  
133 (CL=1050ms) in M cells. While major reduction in  $I_{Kr}$  was most responsible for drug-induced APD  
134 prolongation, a smaller  $I_{to}$  could play the secondary role with the application of dofetilide (Figure 6B).  
135 Furthermore, it was shown that  $I_{NaL}$  and  $I_{CaL}$  could be the major currents responsible to induce AP alternans,  
136 and  $I_{ks}$  and  $I_{NCX}$  may function as protecting currents against AP alternans (Figure 6B and 6C).

## 138 **Discussion**

139 In this study, we quantitatively evaluated the transmural characteristics and rate dependence of drug-  
140 induced arrhythmogenicity through simulations of multichannel pharmacology using a family of cardiac cell  
141 models. To address the misidentification of drug-associated TdP risk based solely on hERG and QT data,  
142 Kramer et al.<sup>[20]</sup> published a predictive model that accounts for L-type Ca<sup>2+</sup> channel blockade in addition to  
143 hERG blockade. This model improved discrimination between torsadogenic and nontorsadogenic drugs over  
144 the hERG assay, and a new model that combines dynamic drug-hERG interactions and multichannel  
145 pharmacology was developed that improved early prediction of compounds' clinical torsadogenic risk<sup>[13]</sup>. In  
146 our study, the drug-induced arrhythmogenic risk was evaluated in diverse cell types. We found that M cells,  
147 in general, are much more vulnerable to drug-induced AP prolongation and EAD generation, which suggest  
148 that the intrinsic arrhythmogenicity of M cells can be much higher than that of other cell types. In addition,  
149 we found that drug-induced changes in APD adaptation can be important during the evaluation of drug-  
150 induced cardiac toxicity. The pronounced increase in APD at slower heart rates allows for the recovery of  
151 inactivated calcium or sodium channels, widening the window of EAD generation, a cellular event that can  
152 induce TdP<sup>[21-24]</sup>. Furthermore, we found that quinidine can generate EAD in all cell types, and the predicted  
153 high TdP risk of quinidine is consistent with that in previous experimental and clinical studies. However, the  
154 mechanism of drug-induced EAD generation differs across cell types; EAD generation in P cells is mostly  
155 due to reactivation of I<sub>NaL</sub>, while in Endo, M and Epi cells, I<sub>CaL</sub> plays the predominant role<sup>[15]</sup>. In addition, we  
156 found that comparing to other cell types, P cells are generally more sensitive to drug-induced changes in AP  
157 alternans at fast pacing rates, that can potentially lead to Purkinje-ventricular conduction abnormalities at  
158 tissue/organ level. Interestingly, with the application of bepridil, AP alternates with beat-to-beat occurrences  
159 of EAD events can be observed in M cells at slower pacing rates. These in silico findings support our  
160 hypothesis that it may be insufficient to evaluate drug-induced arrhythmogenic risk in any single cell type and  
161 at a given frequency.

162 We concluded that simulations of multichannel pharmacology in diverse cell types at all physiological  
163 pacing rates are essential to evaluate drug-induced arrhythmogenic risks. However, the heart is a complex  
164 biological system, and our study was limited at the cellular level, with no evaluation of tissue or organ level  
165 complexities. For example, a recent study presented an arrhythmic hazard map for a 3D whole-ventricle model

166 under multiple ion channel inhibition to predict drug-induced arrhythmogenic risks. However, one advantage  
167 of the series of models used in our study is its computational efficiency, which may enable large-scale in silico  
168 screening for compounds of high cardiac safety, and these quantitative approaches could also offer further  
169 mechanistic insights into drug-induced arrhythmogenic risk.

## 171 **Methods**

172 P, Endo, M, and Epi cell models were derived from the Pan-Rudy(PRd)<sup>[15]</sup> and Keith-Rudy (KRd)<sup>[16]</sup>  
173 models based on experimental data on transmural heterogeneity in electrophysiology by altering  $G_{NaL}$ ,  $G_{to1}$ ,  
174  $G_{Ks}$  and  $G_{naca}$  (see Supplemental Material Table 1 for details). We simulated the application of 12 drugs <sup>[17]</sup> at  
175 their EFTPCs on seven ion channels ( $I_{Na}$ ,  $I_{NaL}$ ,  $I_{CaL}$ ,  $I_{Kr}$ ,  $I_{Ks}$ ,  $I_{to}$  and  $I_{K1}$ ) in four cell models (see Supplemental  
176 Material Table 2 for details). APD was defined as the duration from maximum  $dV_m/dt$  during the AP upstroke  
177 to 90% of full repolarization (APD<sub>90</sub>). All cell simulations were paced for 60 min to reach steady states.

178 To simulate a drug blocking a channel, we used the following equation to scale  $g_x$ , based on the drug  
179  $IC_{50}$  and concentration:

$$180 \quad g_{x,drug} = g_x \left[ 1 + \left( \frac{C}{IC_{50,x}} \right)^h \right]^{-1}$$

181 where  $g_{x, drug}$  is the maximal conductance of channel  $x$  in the presence of the drug;  $C$  is the concentration  
182 of the drug;  $IC_{50,x}$  is the half-maximal inhibitory concentration for that drug and current through channel  $x$ ;  
183 and  $h$  is the  $h_s$  of the drug.

## 184 **Supporting information**

186 **S1 Table 1.** Model details of Epi, Endo and M cells according to experimental measurements.

187 **S1 Table 2.**  $IC_{50}$ s and Hill coefficients ( $h$ ) of drugs were calculated using the inhibition data from the study  
188 by Crumb et al.



## 191 Acknowledgments

192 This work was supported by the National Science Foundation of China (Grant No. U1604178 to P.L.).

## 194 References

- 195 1. Henney JE. Withdrawal of troglitazone and cisapride. *Jama*. 2000;283:2228.
- 196 2. Gottlieb S. Antihistamine drug withdrawn by manufacturer. *BMJ*. 1999;319:7.
- 197 3. Josefson D. Hay fever drug to be banned by the FDA. *BMJ*. 1997;314:248.
- 198 4. Yap YG. Drug induced QT prolongation and torsades de pointes. *Heart*. 2003;89:1363-1372.
- 199 5. International Conference on Harmonisation; guidance on S7B Nonclinical Evaluation of the Potential for  
200 Delayed Ventricular Repolarization (QT Interval Prolongation) by Human Pharmaceuticals; availability.  
201 Notice. *Fed Regist* 2005;70:61133-61134.
- 202 6. Antoons G, Oros A, Beekman JD, Engelen MA, Houtman MJ, Belardinelli L, et al. Late  $na^{+}$  current  
203 inhibition by ranolazine reduces torsades de pointes in the chronic atrioventricular block dog model. *J Am*  
204 *Coll Cardiol*. 2010;55(8):801-9.
- 205 7. Johnson DM, de Jong MM, Crijns HJ, Carlsson LG, Volders PG. Reduced ventricular proarrhythmic  
206 potential of the novel combined ion-channel blocker AZD1305 versus dofetilide in dogs with remodeled hearts.  
207 *Circ Arrhythm Electrophysiol*. 2012;5(1):201-9.
- 208 8. Sager PT, Gintant G, Turner JR, Pettit S, Stockbridge N. Rechanneling the cardiac proarrhythmia safety  
209 paradigm: a meeting report from the Cardiac Safety Research Consortium. *Am Heart J*. 2014;167(3):292-300.
- 210 9. Valentin JP, Hammond T. Safety and secondary pharmacology: successes, threats, challenges and  
211 opportunities. *J Pharmacol Toxicol Methods*. 2008;58(2):77-87.
- 212 10. Fletcher K, Shah RR, Thomas A, et al. Novel approaches to assessing cardiac safety--proceedings of a  
213 workshop: regulators, industry and academia discuss the future of in silico cardiac modelling to predict the  
214 proarrhythmic safety of drugs. *Drug Saf*. 2011;34:439-443. DOI:10.2165/11591950-000000000-00000.
- 215 11. Gintant G. Ions, equations and electrons: the evolving role of computer simulations in cardiac  
216 electrophysiology safety evaluations. *Br J Pharmacol*. 2012;167(5):929-31.

- 217 12. Beattie KA, Luscombe C, Williams G, Munoz-Muriedas J, Gavaghan DJ, Cui Y, et al. Evaluation of an  
218 in silico cardiac safety assay: using ion channel screening data to predict QT interval changes in the rabbit  
219 ventricular wedge. *J Pharmacol Toxicol Methods*. 2013;68(1):88-96.
- 220 13. Li Z, Dutta S, Sheng J, Tran PN, Wu W, Chang K, et al. Improving the In Silico Assessment of  
221 Proarrhythmia Risk by Combining hERG (Human Ether-a-go-go-Related Gene) Channel-Drug Binding  
222 Kinetics and Multichannel Pharmacology. *Circ Arrhythm Electrophysiol*. 2017;10(2):e004628.
- 223 14. Lancaster MC, Sobie EA. Improved Prediction of Drug-Induced Torsades de Pointes Through Simulations  
224 of Dynamics and Machine Learning Algorithms. *Clin Pharmacol Ther*. 2016;100(4):371-9.
- 225 15. Li P, Rudy Y. A model of canine purkinje cell electrophysiology and Ca(2+) cycling: rate dependence,  
226 triggered activity, and comparison to ventricular myocytes. *Circ Res*. 2011;109(1):71-9.
- 227 16. Rudy Y, Silva JR. Computational biology in the study of cardiac ion channels and cell electrophysiology.  
228 *Q Rev Biophys*. 2006;39(1):57-116.
- 229 17. Colatsky T, Fermini B, Gintant G, Pierson JB, Sager P, Sekino Y, et al. The Comprehensive in Vitro  
230 Proarrhythmia Assay (CiPA) initiative - Update on progress. *J Pharmacol Toxicol Methods*. 2016;81:15-20.
- 231 18. Kondo M, Tsutsumi T. Potassium channel openers antagonize the effects of class III antiarrhythmic agents  
232 in canine Purkinje fiber action potentials. Implications for prevention of proarrhythmia induced by class III  
233 agents. *Jpn Heart J* 1999;40:609-619.
- 234 19. Varro A, Nakaya Y, Elharrar V. Effect of antiarrhythmic drugs on the cycle length-dependent action  
235 potential duration in dog Purkinje and ventricular muscle fibers. *J Cardiovasc Pharmacol* 1986;8:178-185.
- 236 20. Kramer J, Obejero-Paz CA, Myatt G, Kuryshev YA, Bruening-Wright A, Verducci JS, et al. MICE models:  
237 superior to the HERG model in predicting Torsade de Pointes. *Sci Rep*. 2013;3:2100.
- 238 21. Cummins MA, Dalal PJ, Bugana M, Severi S, Sobie EA. Comprehensive analyses of ventricular myocyte  
239 models identify targets exhibiting favorable rate dependence. *PLoS Comput Biol*. 2014;10(3):e1003543.
- 240 22. Weiss JN, Garfinkel A, Karagueuzian HS, Chen PS, Qu Z. Early afterdepolarizations and cardiac  
241 arrhythmias. *Heart Rhythm*. 2010;7(12):1891-9.
- 242 23. Weissenburger J, Davy JM. Experimental models of torsades de pointes. *Fundam Clin Pharmacol*.  
243 1993;7:29-38.

- 244 24. Yan G-X, Wu Y, Liu T, Wang J, Marinchak RA, Kowey PR. Phase 2 Early Afterdepolarization as a  
245 Trigger of Polymorphic Ventricular Tachycardia in Acquired Long-QT Syndrome. *Circulation*.  
246 2001;103(23):2851-6.

247

248



## Figure Legends

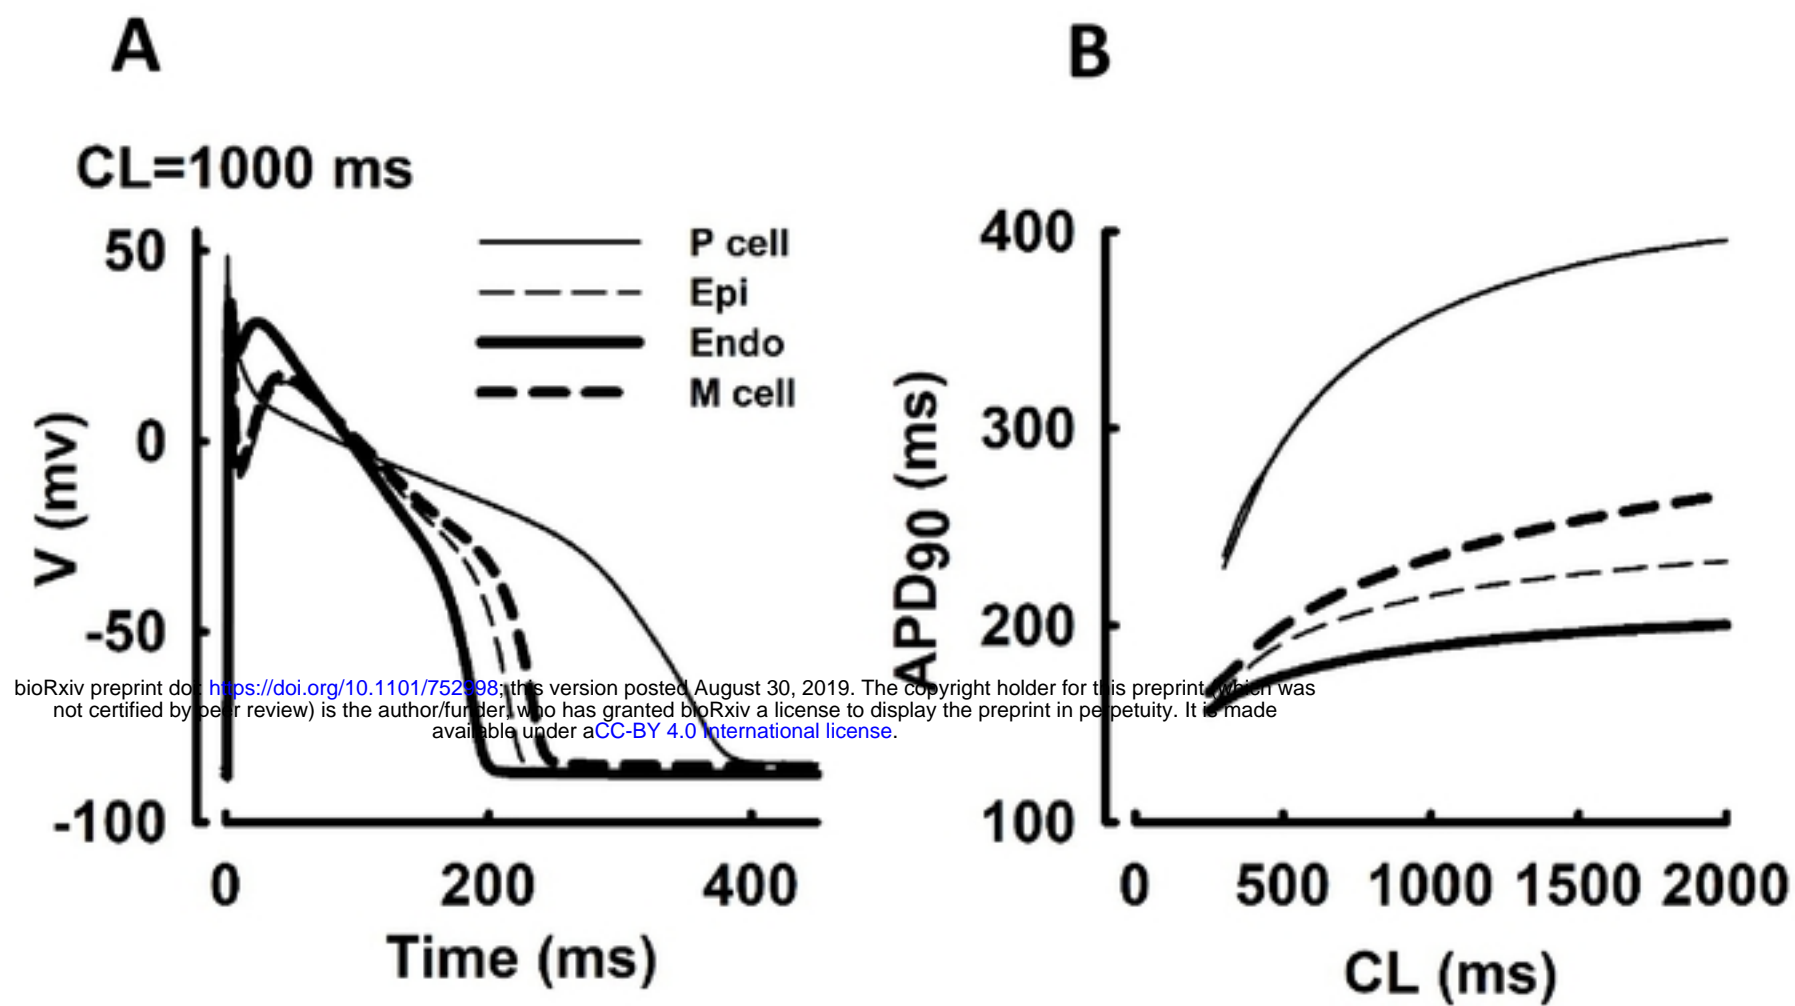

**Fig 1** Transmural AP morphologies (A) and APD rate adaptations (B) in Purkinje (P), epicardial (Epi), endocardial (Endo) and mid-myocardial (M) cells.

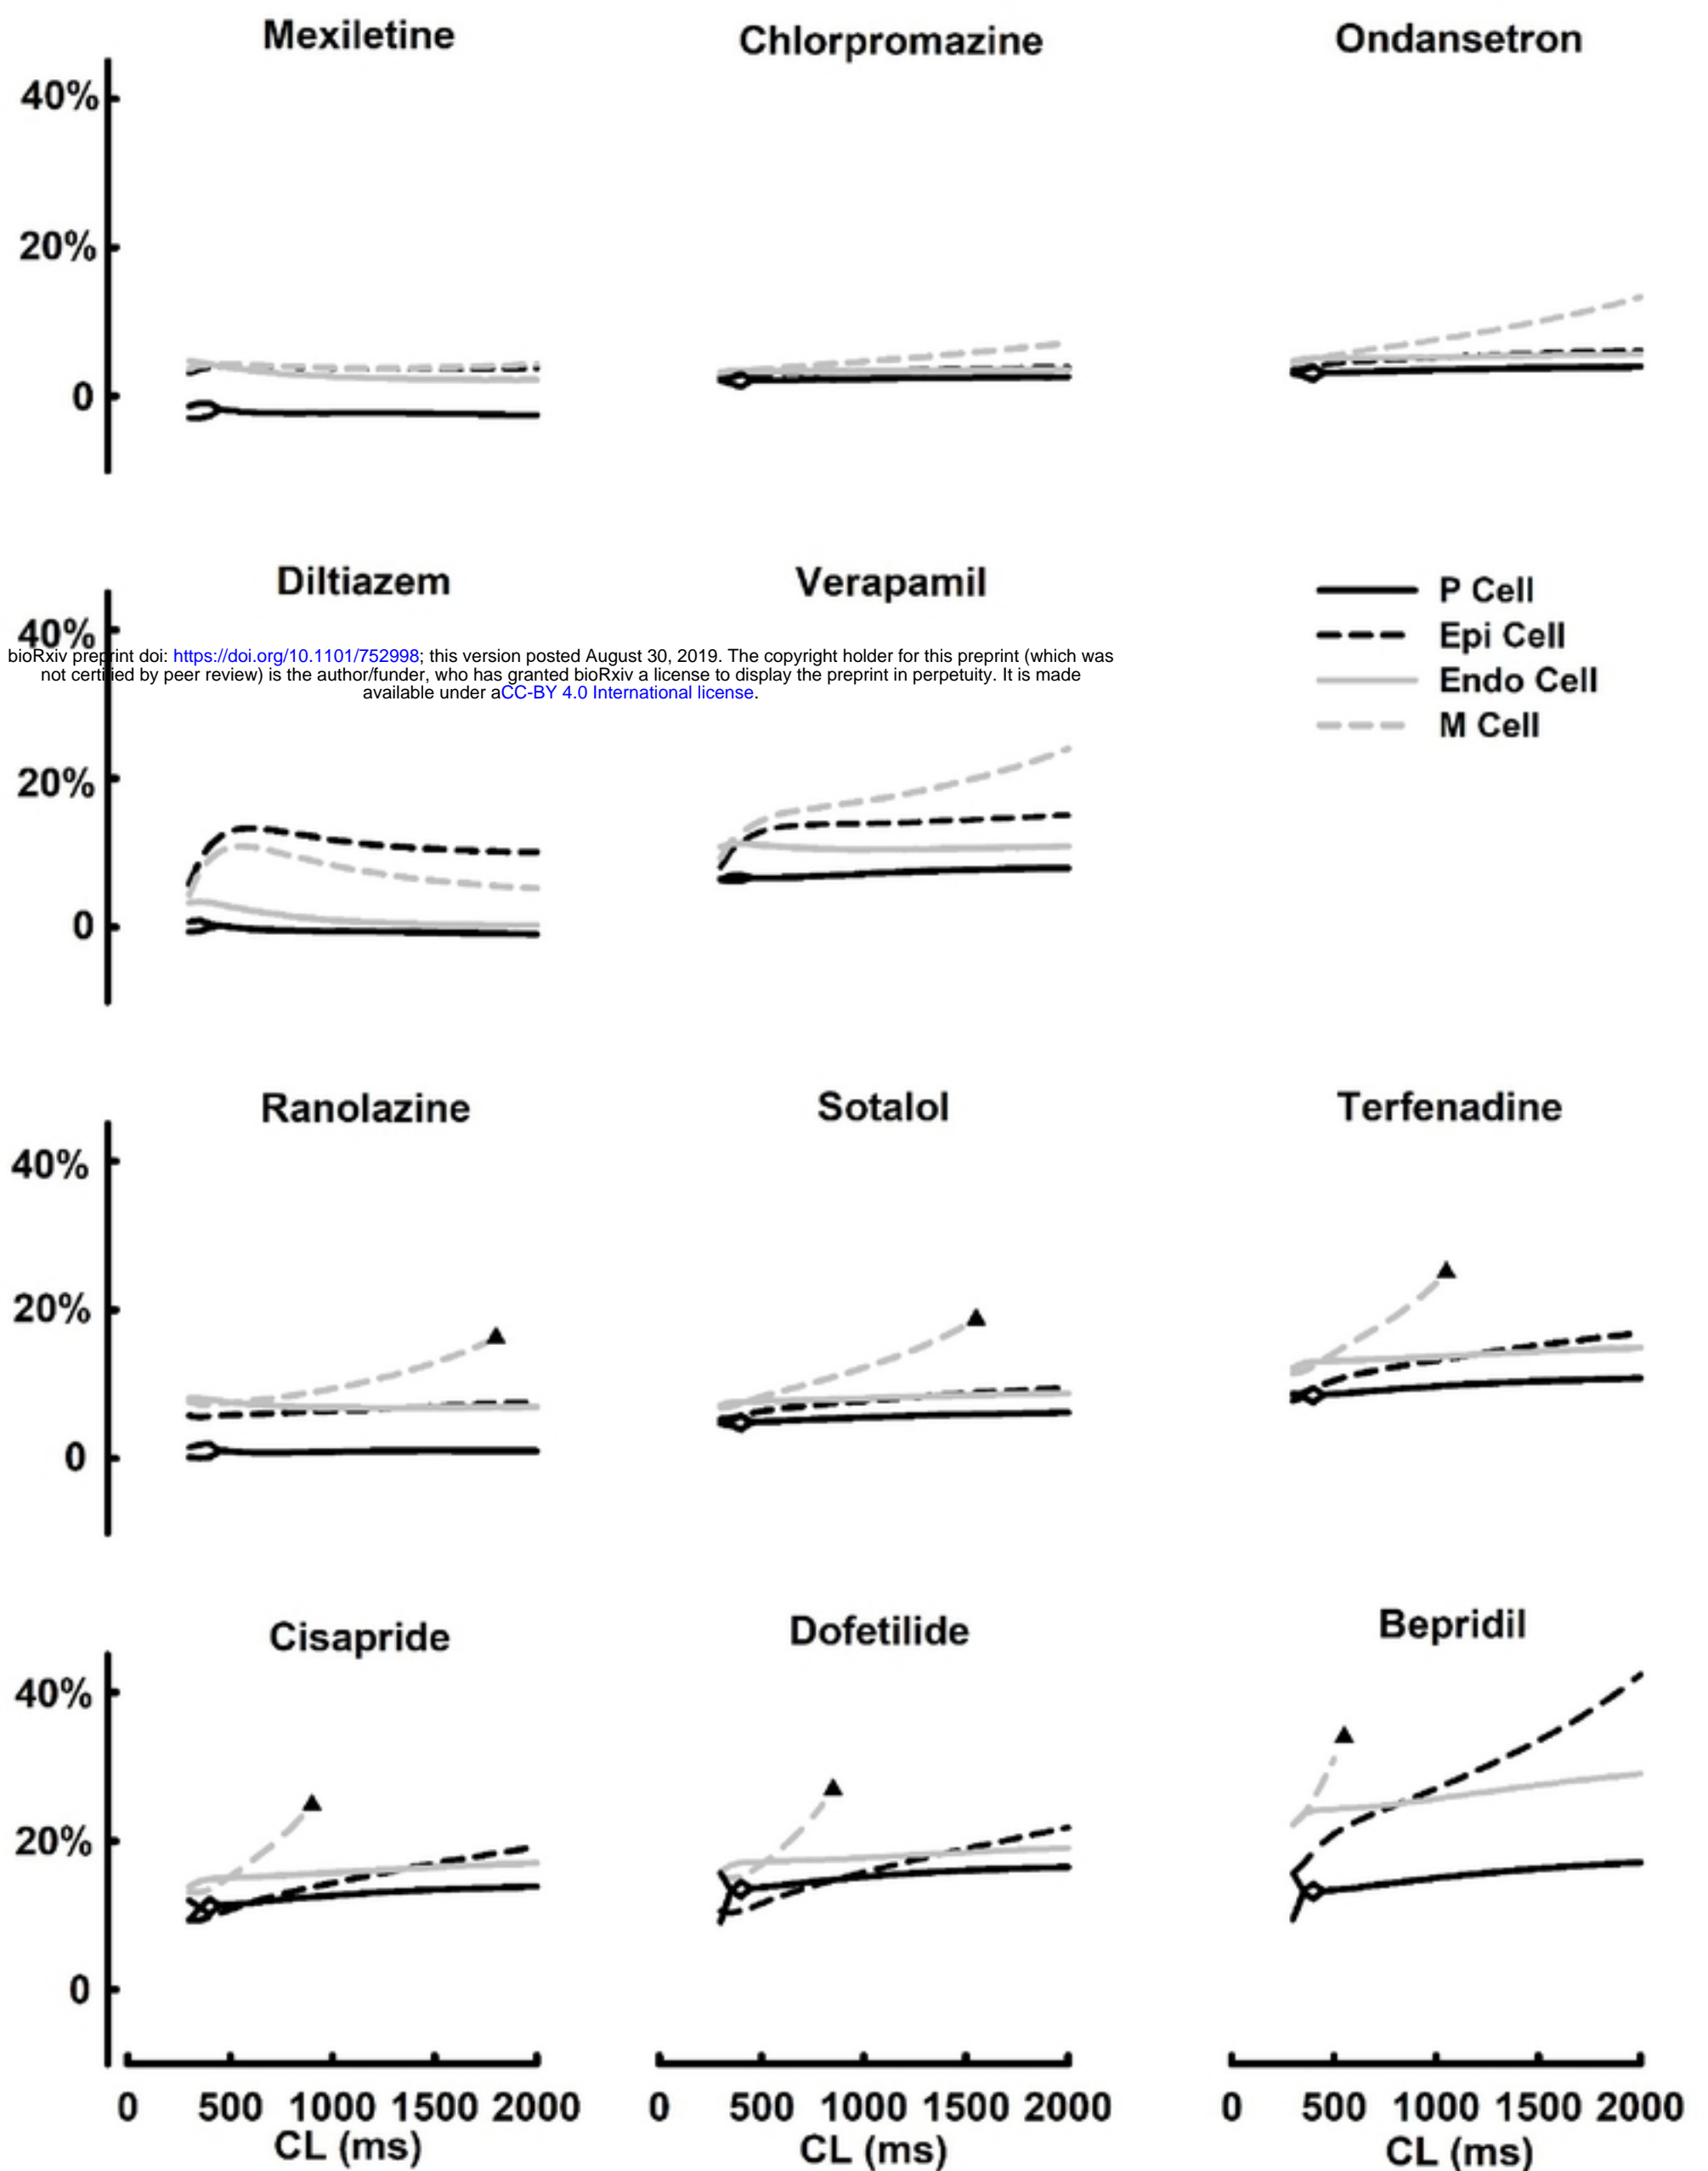

**Fig 2** Drug-induced changes in AP adaptations in Purkinje (P), endocardial (Endo), mid-myocardial (M), and epicardial (Epi) cells. All drugs were applied at their effective free therapeutic plasma concentrations (EFTPCs), and black triangles indicate occurrences of EAD events.

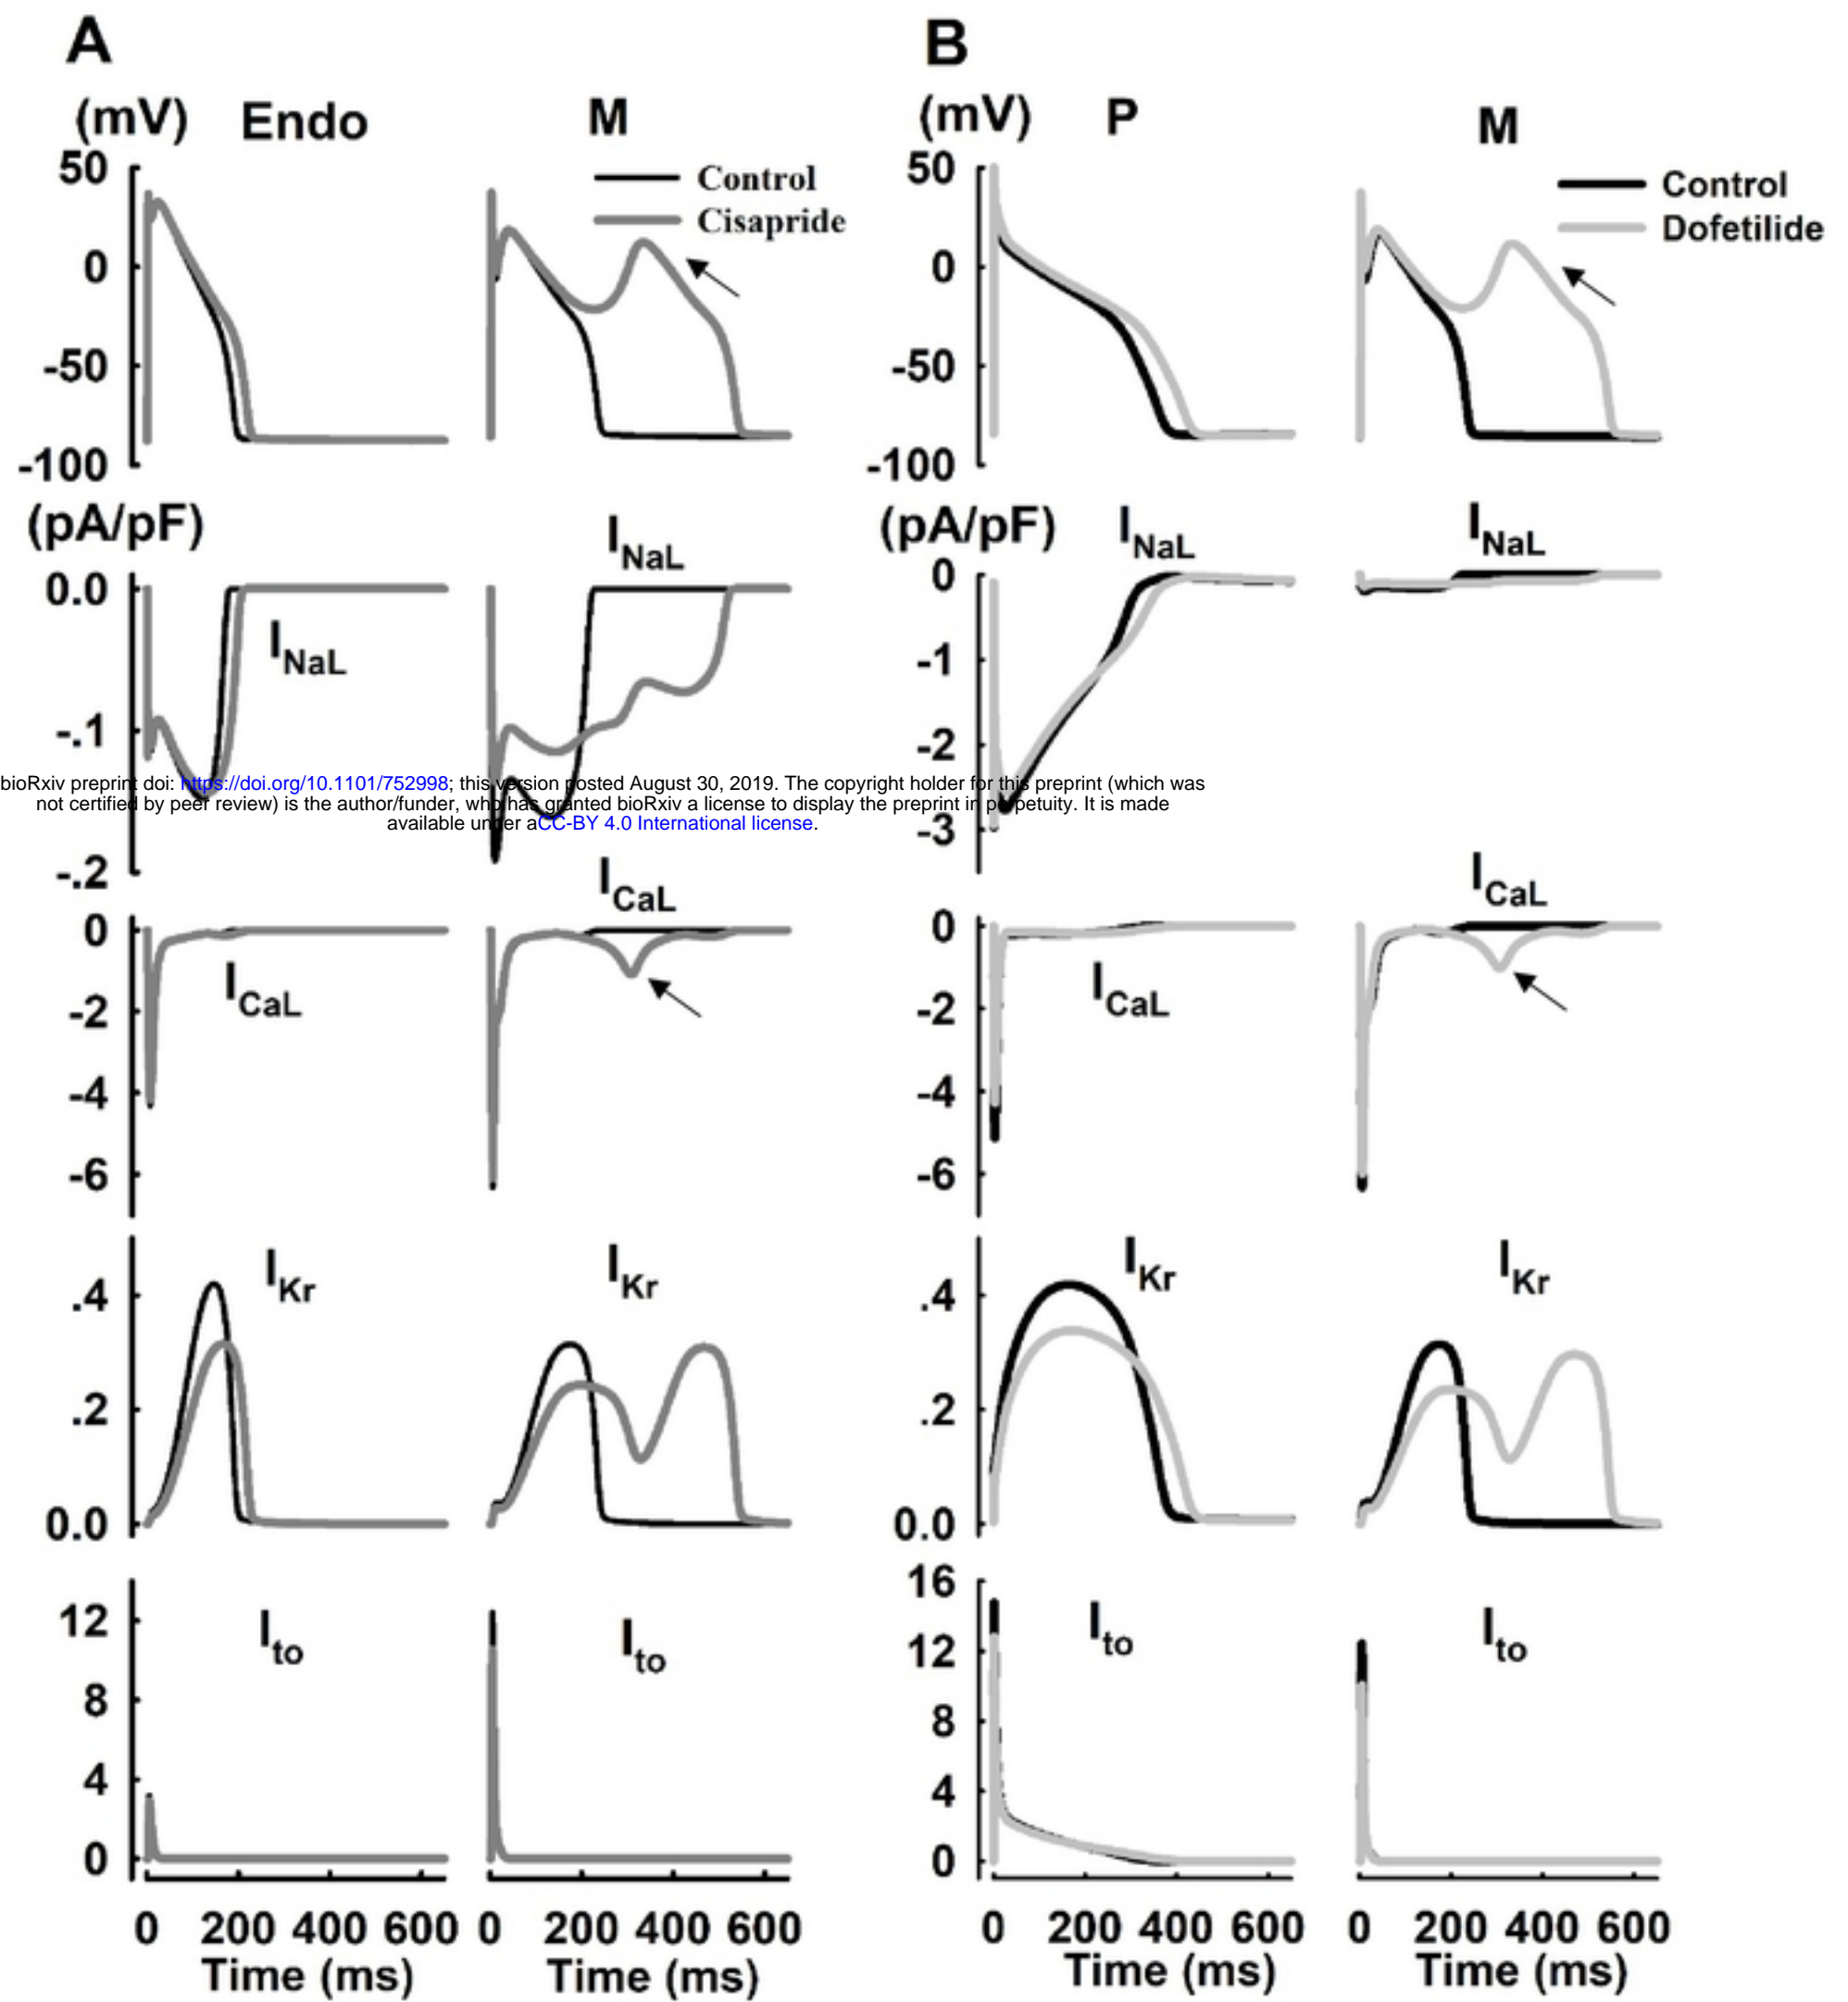

bioRxiv preprint doi: <https://doi.org/10.1101/752998>; this version posted August 30, 2019. The copyright holder for this preprint (which was not certified by peer review) is the author/funder, who has granted bioRxiv a license to display the preprint in perpetuity. It is made available under aCC-BY 4.0 International license.

**Fig 3** Cell dependent properties of cisapride and dofetilide at fixed CL=1000 ms. A: APs and ionic currents ( $I_{NaL}$ ,  $I_{CaL}$ ,  $I_{Kr}$ , and  $I_{to1}$ ) in Endo and M cells with the application of cisapride; B: APs and ionic currents ( $I_{NaL}$ ,  $I_{CaL}$ ,  $I_{Kr}$ , and  $I_{to1}$ ) in P and M cells with the application of dofetilide.

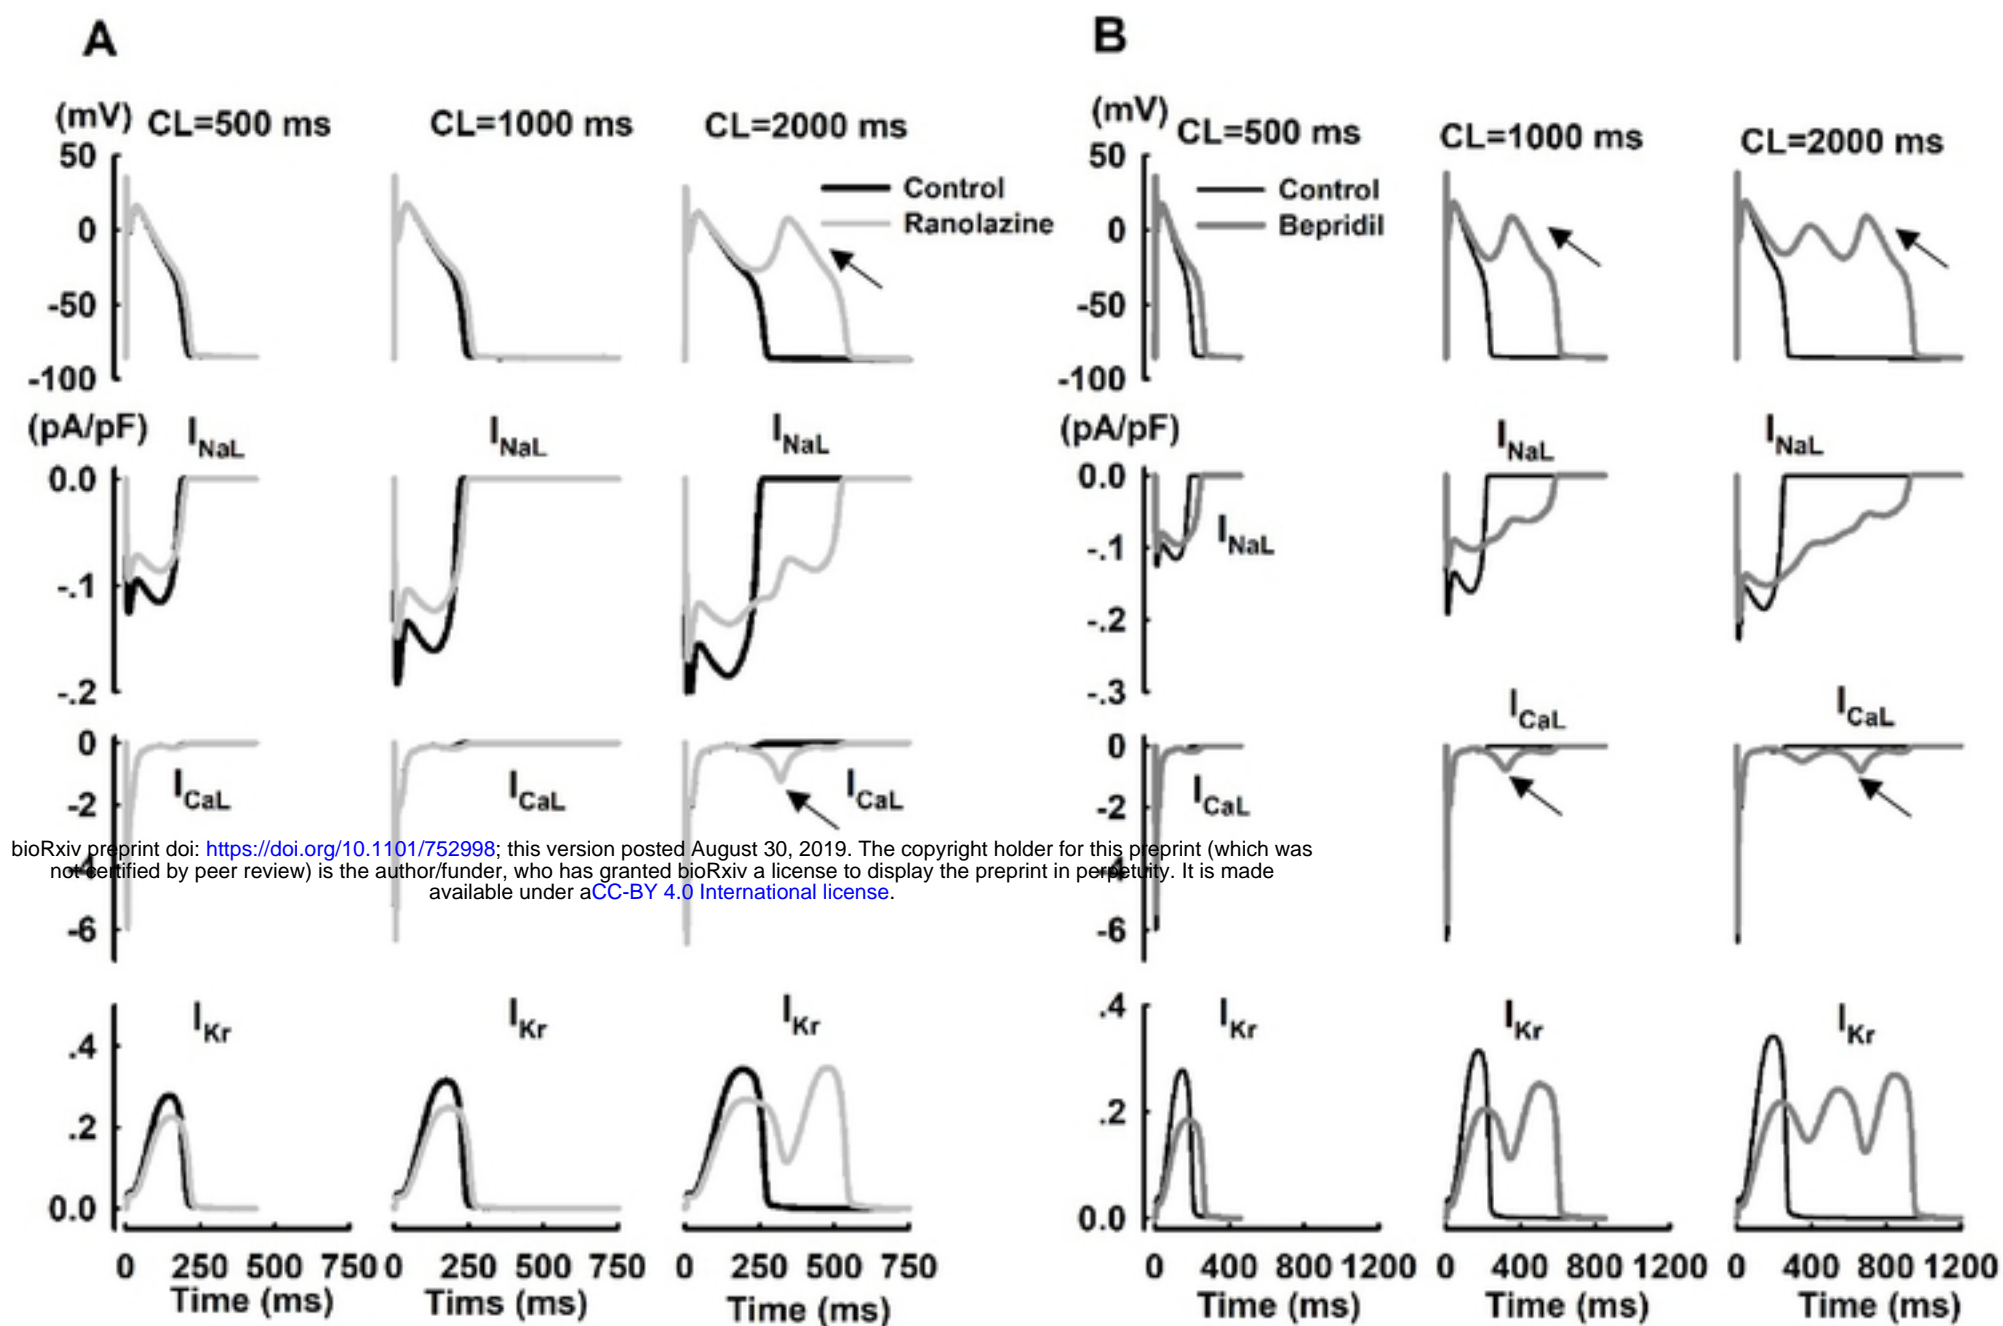

bioRxiv preprint doi: <https://doi.org/10.1101/752998>; this version posted August 30, 2019. The copyright holder for this preprint (which was not certified by peer review) is the author/funder, who has granted bioRxiv a license to display the preprint in perpetuity. It is made available under aCC-BY 4.0 International license.

**Fig 4** Rate-dependent properties of ranolazine and bepridil in M cells at different pacing CLs. A: APs and ionic currents ( $I_{NaL}$ ,  $I_{CaL}$ , and  $I_{Kr}$ ) at different CLs with the application of ranolazine; B: APs and ionic currents ( $I_{NaL}$ ,  $I_{CaL}$ , and  $I_{Kr}$ ) at different CLs with the application of bepridil.



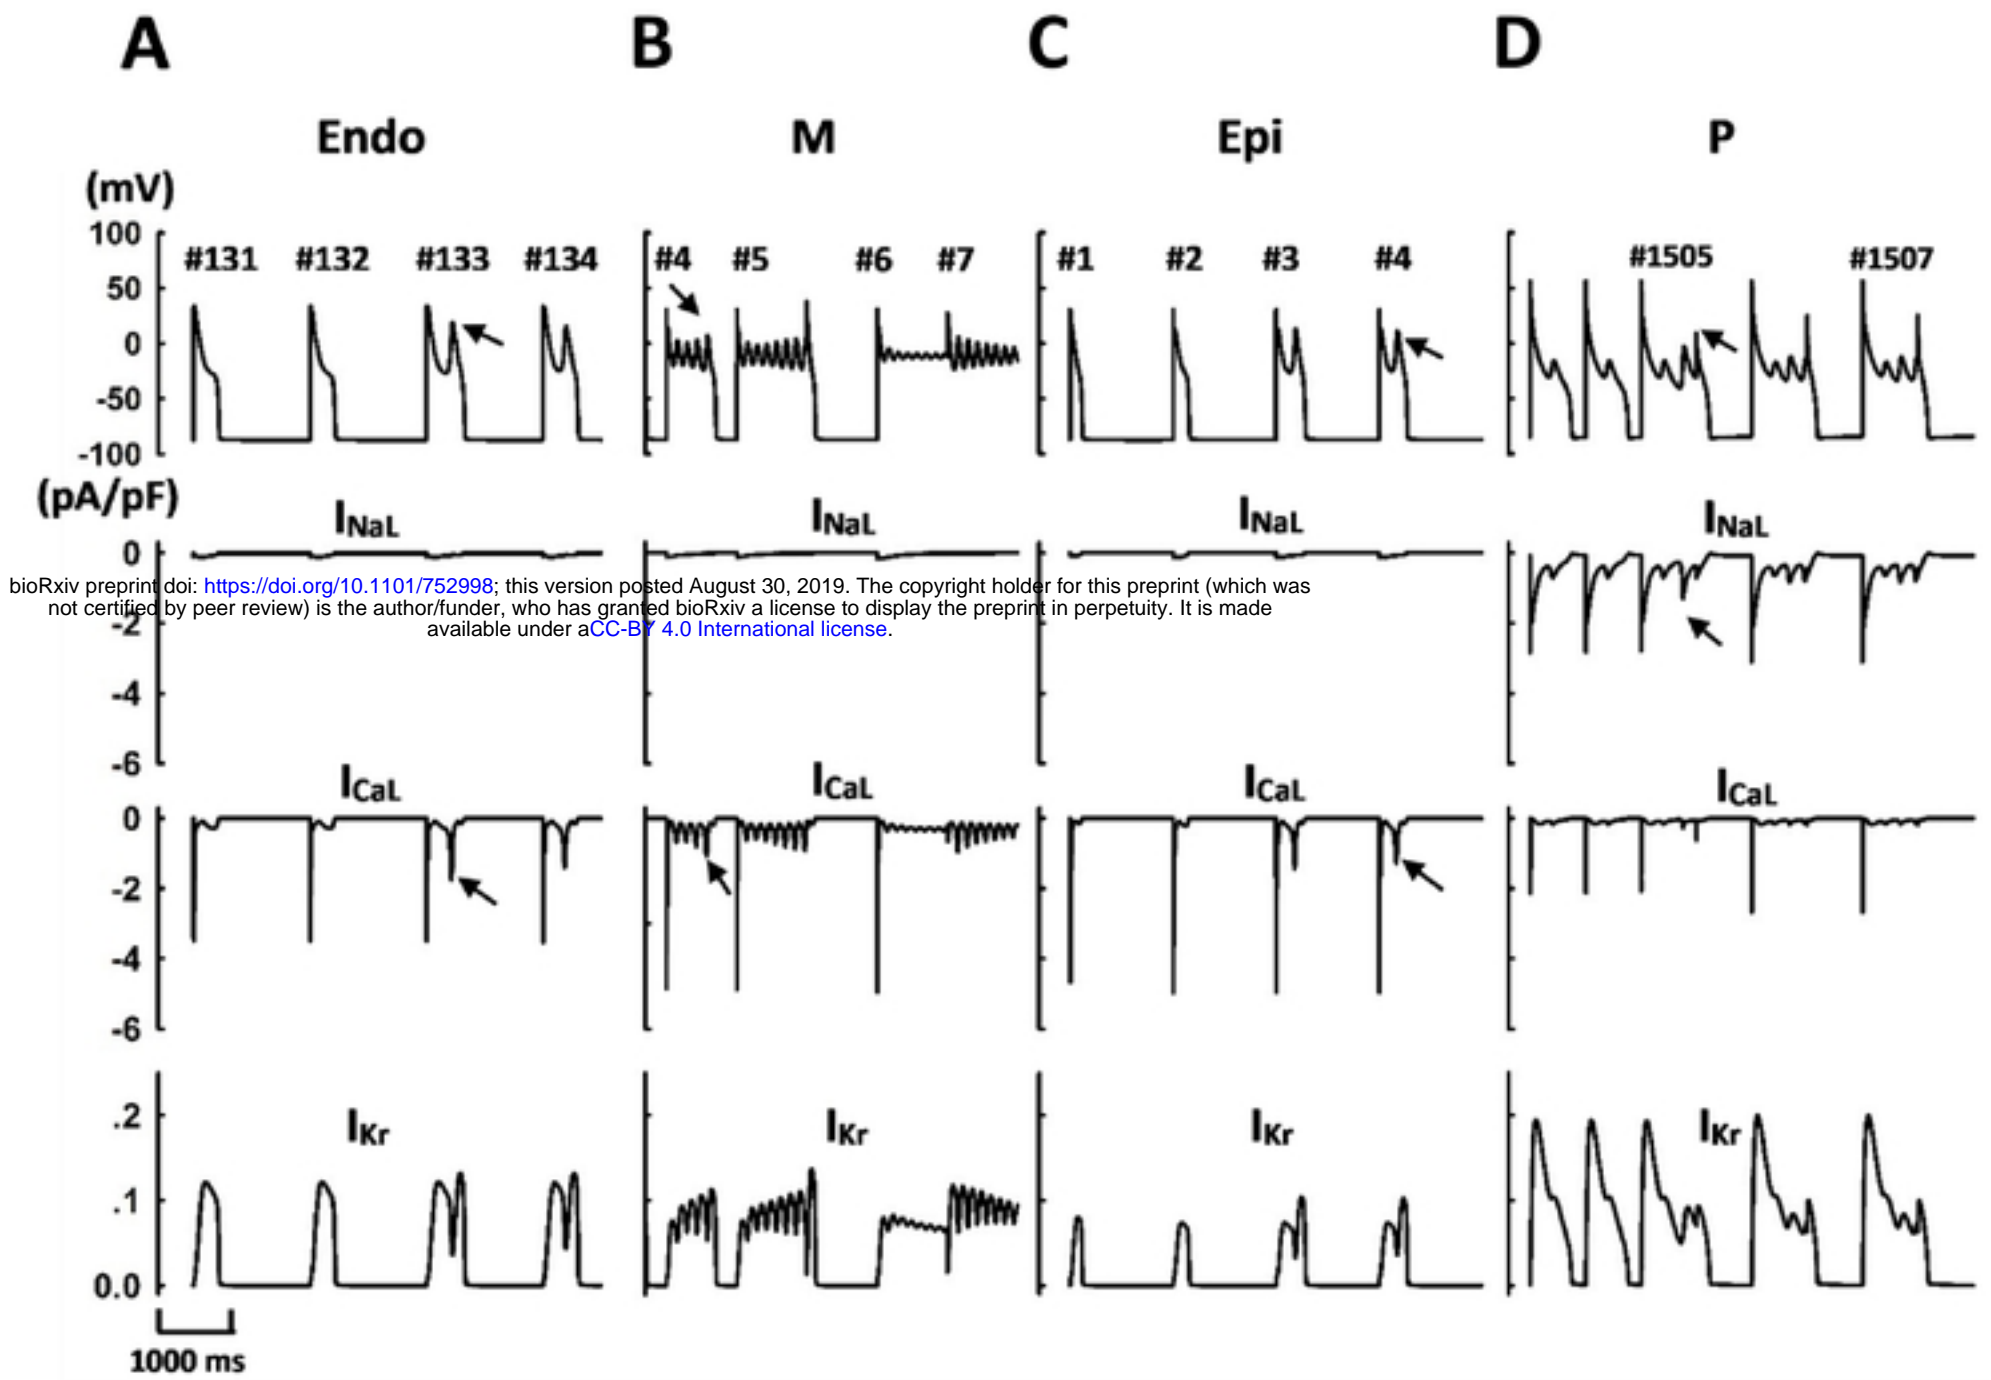

**Fig 5** EAD events and underlying ionic currents with the application of quinidine in Endo (A), M (B), Epi (C) and P (D) cells at a fixed CL=2000 ms.

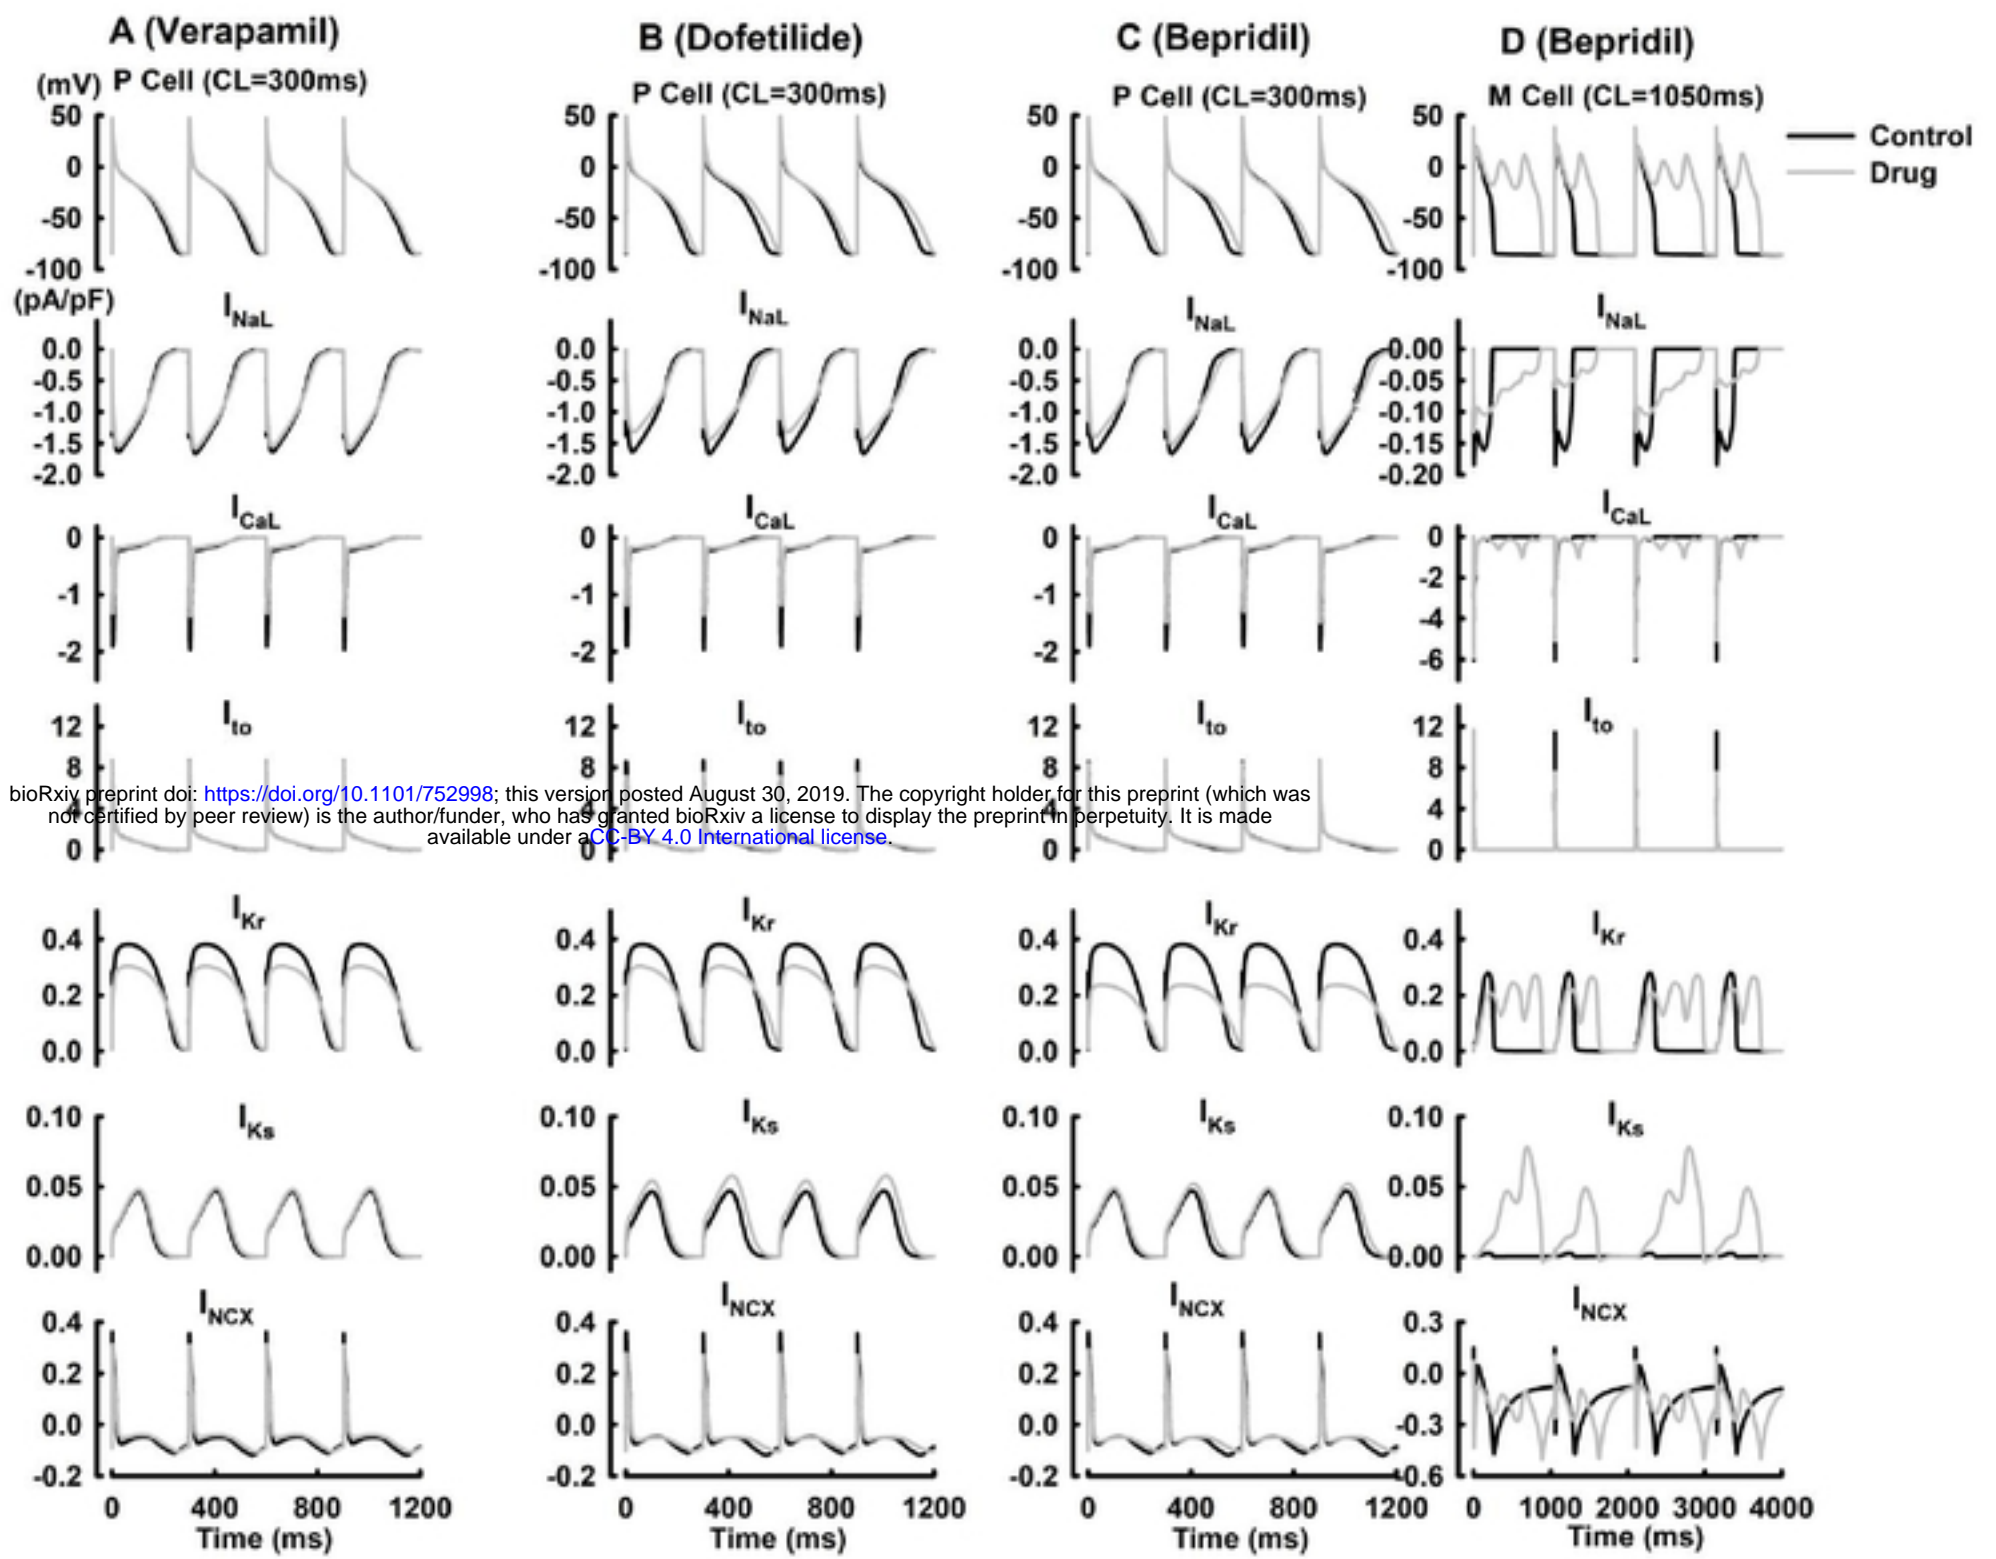

**Fig 6** AP alternans and underlying ionic currents with the application of verapamil (A), dofetilide (B), bepridil (C) in P cells at CL=300ms, and bepridil in M cells at CL=1050ms (D).

bioRxiv preprint doi: <https://doi.org/10.1101/752998>; this version posted August 30, 2019. The copyright holder for this preprint (which was not certified by peer review) is the author/funder, who has granted bioRxiv a license to display the preprint in perpetuity. It is made available under aCC-BY 4.0 International license.
